# Supplementary material for: Characterization of polyamidoamino (PAMAM) dendrimers using in-line reversed phase LC electrospray ionization mass spectrometry
Source: Royal Society of Chemistry journal article supplement (doi:10.1039/c5ay01995h), 2015-12-08
Supplement: c5ay01995h1.pdf [file c5ay01995h1.pdf]

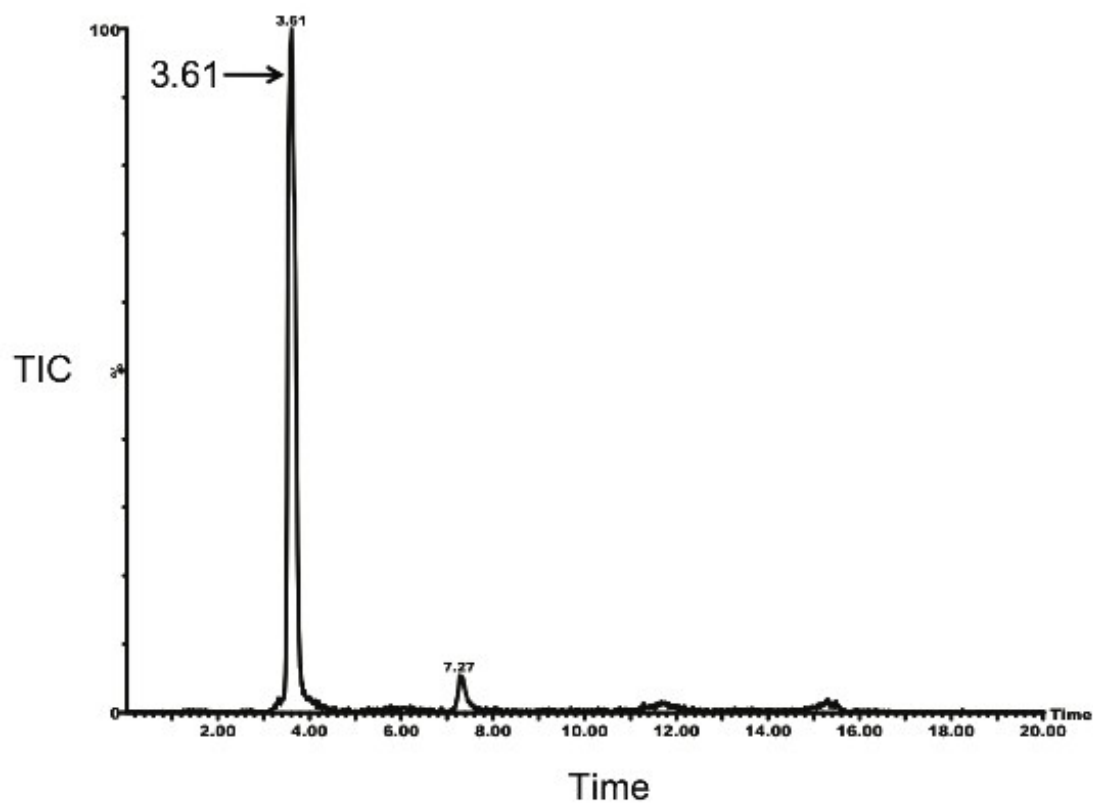

**Supplementary Figure 1.** ESI/LC/MS TIC chromatogram of all amino-G3 PAMAM dendrimer at initial state.

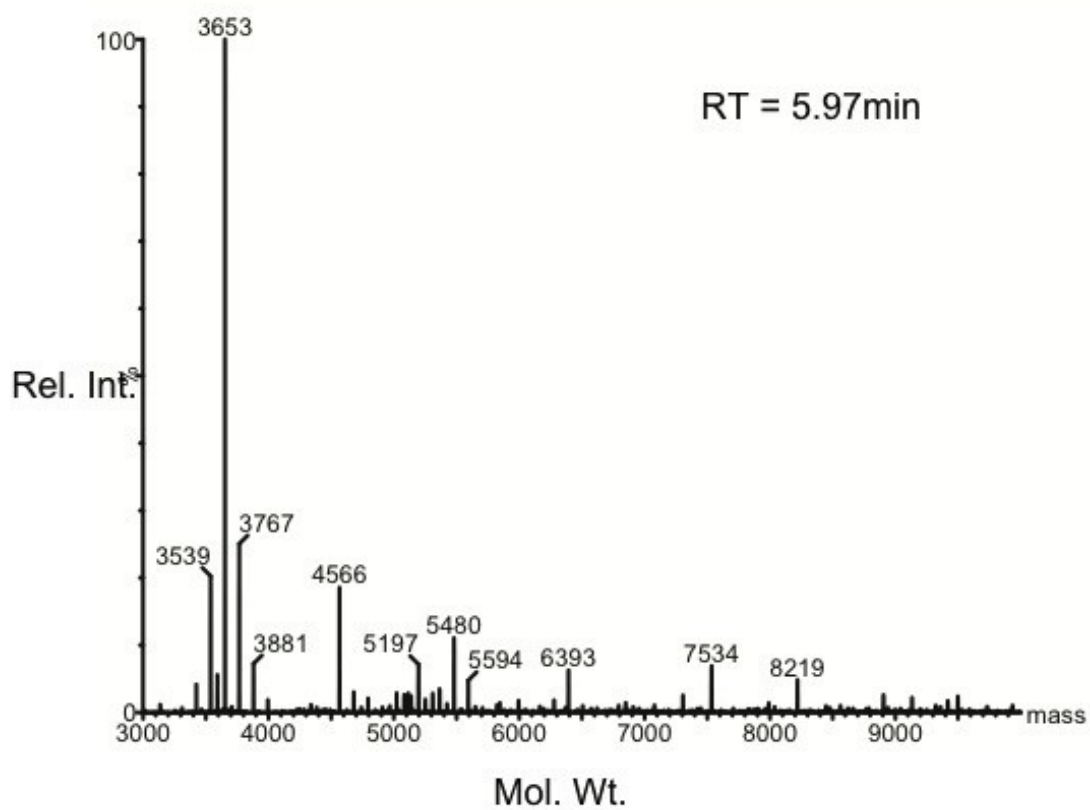

**Supplementary Figure 2.** ESI/MS of the LC peak RT= 5.97 min. after 3 freeze-thaw cycles.

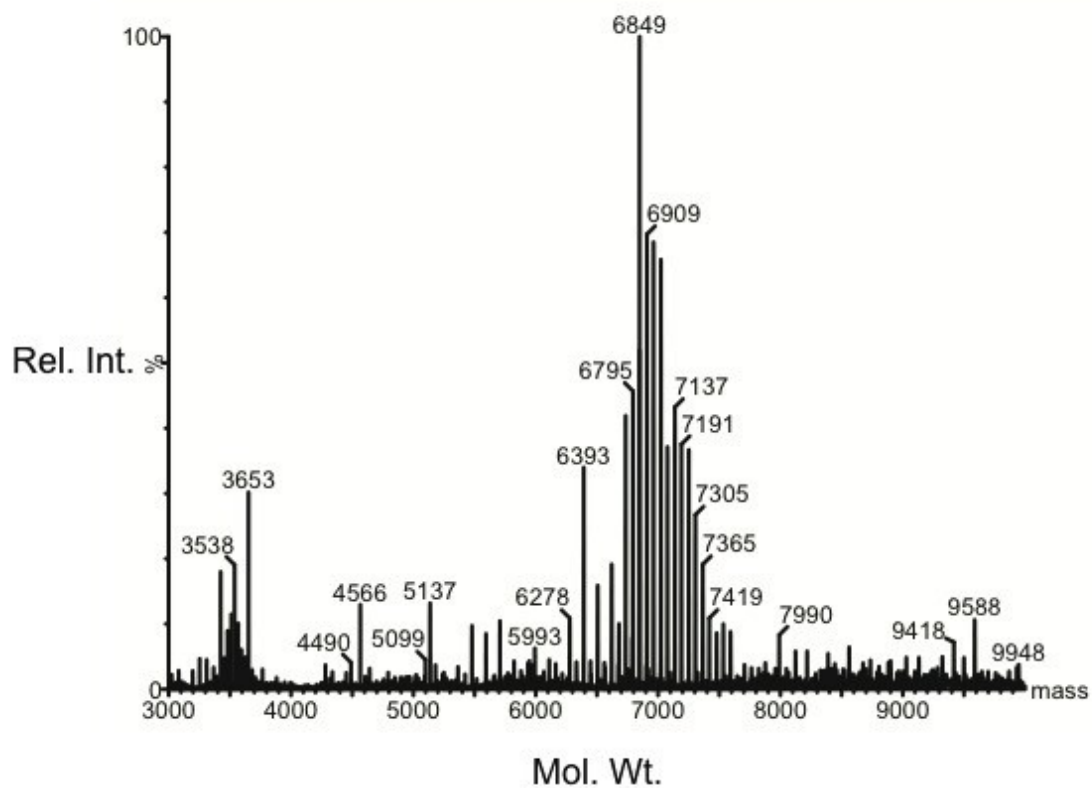

**Supplemental Figure 3.** ESI/MS spectrum of LC peak at RT=6.0 min. of all-amino-G3 PAMAM dendrimer after 3x freeze-thaw cycles.

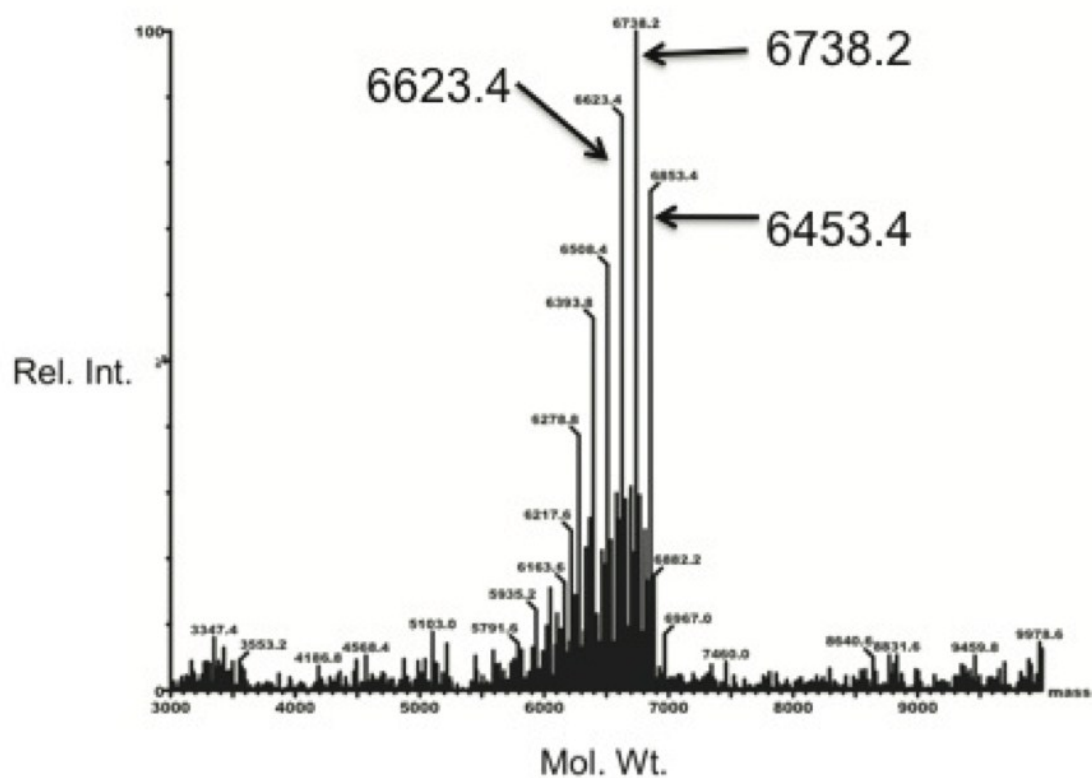

**Supplemental Figure 4.** ESI/MS of all-hydroxy-G3 PAMAM dendrimer.

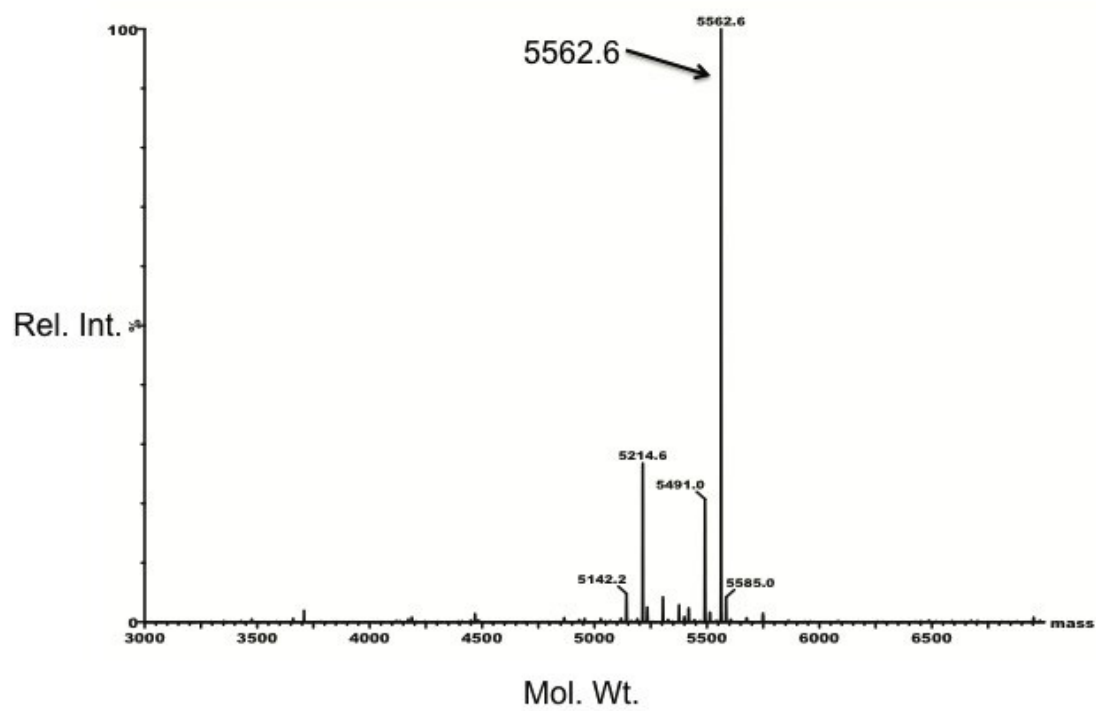

**Supplemental Figure 5.** ESI/MS of all carboxy-G3 PAMAM dendrimer.

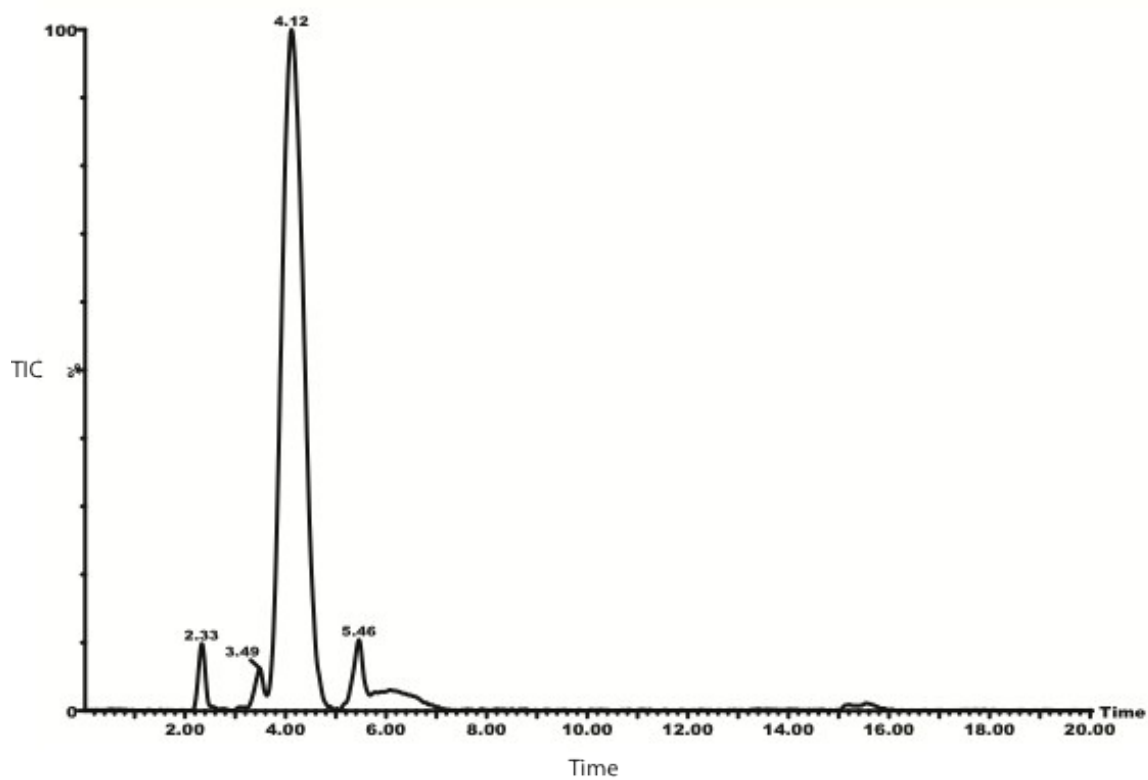

**Supplemental Figure 6.** LC/ESI/MS TIC trace of all-carboxy-G3 PAMAM dendrimer provided in methanol solution.

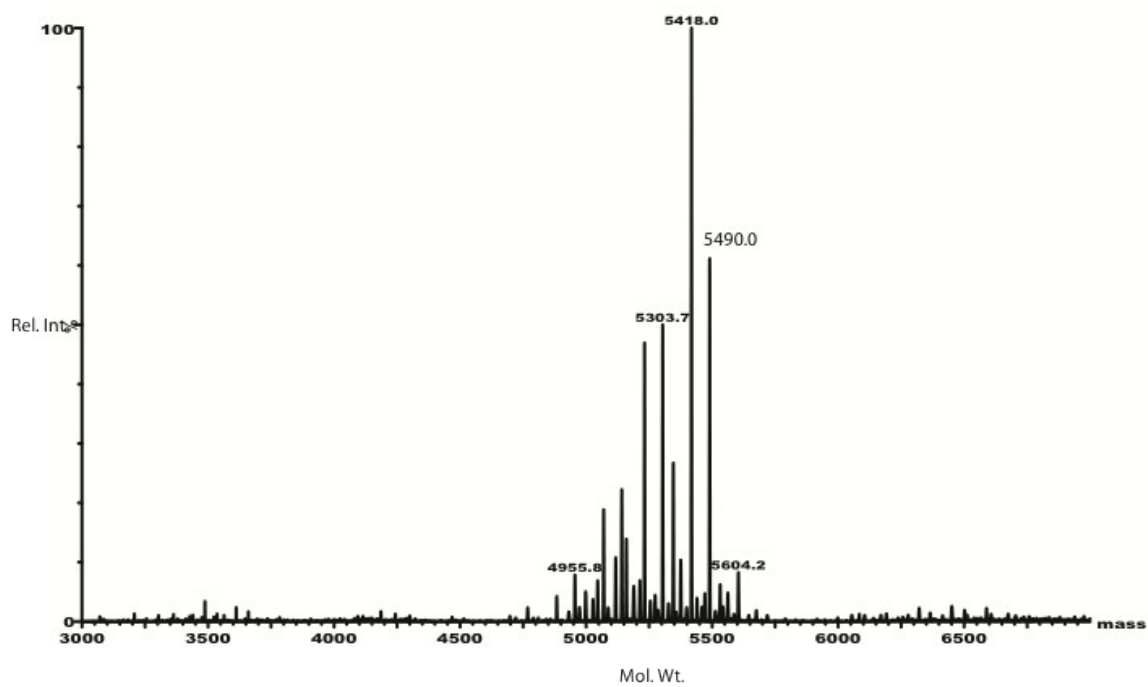

**Supplemental Figure 7.** ESI/MS of degraded all-carboxy-G3 PAMAM dendrimer.

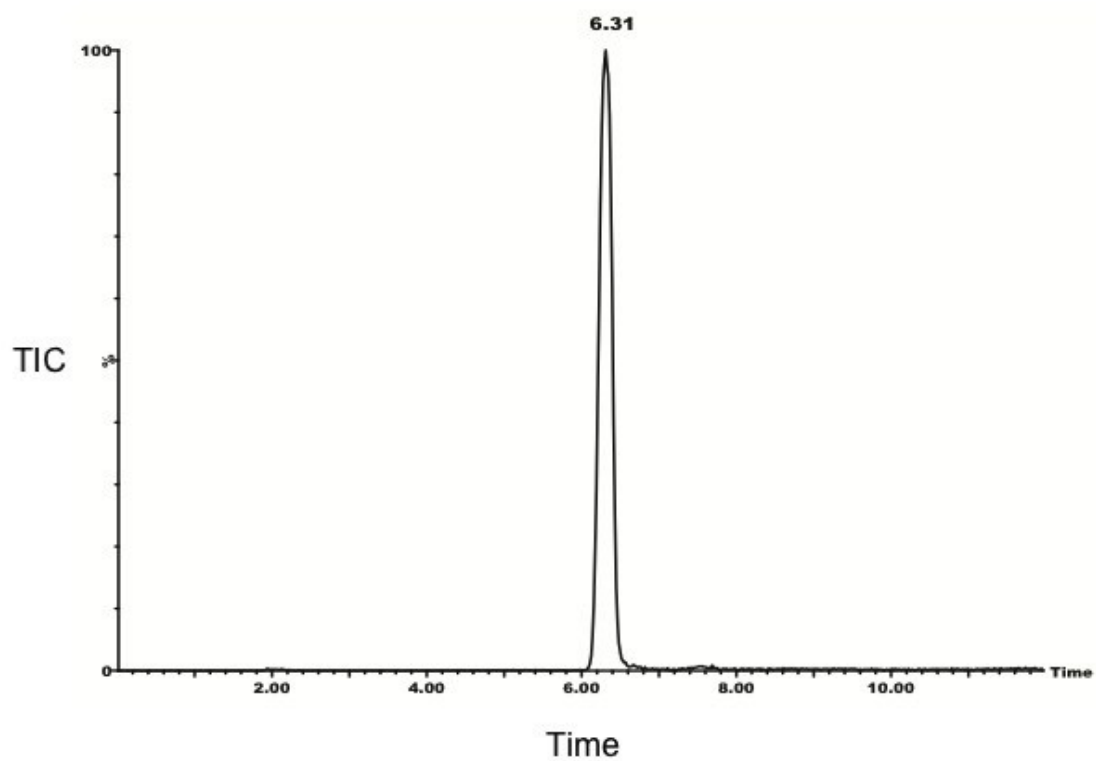

**Supplemental Figure 8.** LC/ESI/MS TIC plot of an isolated impurity from all-carboxy-G3 PAMAM dendrimer.
